# Supplementary material for: Preliminary Outcomes of an Ecological Momentary Intervention for Social Functioning in Schizophrenia: Pre-Post Study of the Motivation and Skills Support App
Source: PubMed Central journal article supplement (PMC8277369; doi:10.2196/27475), 2021-06-15
Supplement: mental_v8i6e27475_app1.pdf [file mental_v8i6e27475_app1.pdf]

## UPDATED MASS App pilot SST videos

### Long form (combined G&M and J&S):

Part 1: <https://www.youtube.com/watch?v=x5npKkQnKXM&feature=youtu.be>

Part 2: <https://www.youtube.com/watch?v=4pTC2NYoIKA&feature=youtu.be>

Part 3: <https://www.youtube.com/watch?v=sAiuV3jYtcg&feature=youtu.be>

Part 4: <https://www.youtube.com/watch?v=bqJX-BONnfs&feature=youtu.be>

### Skill intros

1: <https://www.youtube.com/watch?v=7rCtwxFNwwE>

2: <https://www.youtube.com/watch?v=tbIL1Om3ayg>

3: <https://www.youtube.com/watch?v=brhPoTcqjCk>

4: <https://www.youtube.com/watch?v=OYluKKC9JYs>

5: <https://www.youtube.com/watch?v=ASOwtnQFAI8>

6: <https://www.youtube.com/watch?v=h5ITWleIJfg>

7: [https://www.youtube.com/watch?v=lzu\\_BTcFIC8](https://www.youtube.com/watch?v=lzu_BTcFIC8)

8: <https://www.youtube.com/watch?v=-T0vJx3qmgo>

### Gabriel and Maria (re-mastered audio)

1C combined: <https://www.youtube.com/watch?v=ZDV7IzhDsjg>

1D Combined: <https://www.youtube.com/watch?v=8uQvSW8sggQ>

2C combined: <https://www.youtube.com/watch?v=vb6K2AxJgOA>

3B combined: [https://www.youtube.com/watch?v=\\_fINiAoYOyQ](https://www.youtube.com/watch?v=_fINiAoYOyQ)

3D combined: [https://www.youtube.com/watch?v=Qn\\_kbtztUSo](https://www.youtube.com/watch?v=Qn_kbtztUSo)

4A combined: <https://www.youtube.com/watch?v=dyjKf1LkLio>

5A combined: <https://youtu.be/see8oSd6FTI>

5C combined: [https://youtu.be/Um\\_CnHv8GJJU](https://youtu.be/Um_CnHv8GJJU)

6A combined: [https://youtu.be/\\_fkS7cqGQXs](https://youtu.be/_fkS7cqGQXs)

7B combined: <https://youtu.be/skYYIWwXCTE>

7D combined: <https://youtu.be/O5VV9koUHoo>

8A combined: <https://youtu.be/M0gVn2sRWV4>

8C combined: <https://youtu.be/hzC0Whw-HRw>

Gabriel and Maria Midway Summary: <https://youtu.be/F7wmllygjBs>

Gabriel and Maria Final Summary: [https://youtu.be/H\\_IdZA0cZ5U](https://youtu.be/H_IdZA0cZ5U)

## John and Sally

- 1A: <https://www.youtube.com/watch?v=TmlbQ2jVBjw&feature=youtu.be>
- 1B: [https://www.youtube.com/watch?v=xC0dlbr\\_IPE&feature=youtu.be](https://www.youtube.com/watch?v=xC0dlbr_IPE&feature=youtu.be)
- 2A: <https://www.youtube.com/watch?v=arEPF--XM5Q&feature=youtu.be>
- 2B: <https://www.youtube.com/watch?v=chAoHF1SoQA&feature=youtu.be>
- 3A: <https://www.youtube.com/watch?v=MmFlzEltttc&feature=youtu.be>
- 3C: <https://www.youtube.com/watch?v=AIF33cDxmIU&feature=youtu.be>
- 4B: <https://www.youtube.com/watch?v=g-WTXESUtTw&feature=youtu.be>
- 4C combined: <https://www.youtube.com/watch?v=qdkW-1jMUbc&feature=youtu.be>
- 5B: <https://www.youtube.com/watch?v=VBrv68SX80g&feature=youtu.be>
- 5D: [https://www.youtube.com/watch?v=vw\\_D2nfP\\_B0&feature=youtu.be](https://www.youtube.com/watch?v=vw_D2nfP_B0&feature=youtu.be)
- 6B: <https://www.youtube.com/watch?v=YFLxZKHWqLQ&feature=youtu.be>
- 6C: <https://www.youtube.com/watch?v=KqPI-qy5tVQ&feature=youtu.be>
- 7A: <https://www.youtube.com/watch?v=Sd6j4QeQRno&feature=youtu.be>
- 7C: <https://www.youtube.com/watch?v=yAimds14XWg&feature=youtu.be>
- 8B: <https://www.youtube.com/watch?v=J4gaMV0T62Y&feature=youtu.be>
- 8D: <https://www.youtube.com/watch?v=8rSGkUEt3bA&feature=youtu.be>

## Active Listening:

- Active Listening Intro: <https://www.youtube.com/watch?v=7rCtwxFNwwE>
- Gabriel and Maria Part 1 <https://www.youtube.com/watch?v=ZDV7IzhDsjg>
- Gabriel and Maria Part 2 <https://www.youtube.com/watch?v=8uQvSW8sgqQ>
- John and Sally Part 1: <https://www.youtube.com/watch?v=TmlbQ2jVBjw&feature=youtu.be>
- John and Sally Part 2 [https://www.youtube.com/watch?v=xC0dlbr\\_IPE&feature=youtu.be](https://www.youtube.com/watch?v=xC0dlbr_IPE&feature=youtu.be)

## Expressing Pleasant Feelings

- Expressing Pleasant Feelings Intro: <https://www.youtube.com/watch?v=tbIL1Om3ayg>
- Gabriel and Maria: <https://www.youtube.com/watch?v=vb6K2AxJgOA>
- John and Sally Part 1: <https://www.youtube.com/watch?v=arEPF--XM5Q&feature=youtu.be>
- John and Sally Part 2:  
<https://www.youtube.com/watch?v=chAoHF1SoQA&feature=youtu.be>

## Making Positive Requests

- Making Positive Requests Intro: <https://www.youtube.com/watch?v=brhPoTcqjCk>
- Gabriel and Maria Part 1: [https://www.youtube.com/watch?v=\\_flNiAoYOyQ](https://www.youtube.com/watch?v=_flNiAoYOyQ)
- Gabriel and Maria Part 2: [https://www.youtube.com/watch?v=Qn\\_kbtztUSo](https://www.youtube.com/watch?v=Qn_kbtztUSo)
- John and Sally Part 1: <https://www.youtube.com/watch?v=MmFlzEltttc&feature=youtu.be>

John and Sally Part 2: <https://www.youtube.com/watch?v=AIF33cDxmlIU&feature=youtu.be>

### **Expressing Unpleasant feelings**

Expressing Unpleasant Feelings Intro: <https://www.youtube.com/watch?v=OYluKKC9JYs>

Gabriel and Maria: <https://www.youtube.com/watch?v=djKf1LkLio>

John and Sally Part 1: <https://www.youtube.com/watch?v=g-WTXESUtTw&feature=youtu.be>

John and Sally Part 2: <https://www.youtube.com/watch?v=qdkW-1jMUbc&feature=youtu.be>

### **Giving and Accepting Compliments**

Giving and Accepting Compliments Intro: <https://www.youtube.com/watch?v=ASOwtNqFAI8>

Gabriel and Maria Part 1: <https://youtu.be/see8oSd6FTI>

Gabriel and Maria Part 2: [https://youtu.be/Um\\_CnHv8GJU](https://youtu.be/Um_CnHv8GJU)

John and Sally Part 1: <https://www.youtube.com/watch?v=VBrv68SX80g&feature=youtu.be>

John and Sally Part 2: [https://www.youtube.com/watch?v=vw\\_D2nfP\\_B0&feature=youtu.be](https://www.youtube.com/watch?v=vw_D2nfP_B0&feature=youtu.be)

### **Finding Common interests**

Finding Common Interests Intro: <https://www.youtube.com/watch?v=h5ITWleIJfg>

Gabriel and Maria [https://youtu.be/\\_fkS7cqGQXs](https://youtu.be/_fkS7cqGQXs)

John and Sally Part

1: <https://www.youtube.com/watch?v=YFLxZKHWqLQ&feature=youtu.be>

John and Sally Part 2: <https://www.youtube.com/watch?v=KqPI-qy5tVQ&feature=youtu.be>

### **Compromising and Negotiating**

Compromising and Negotiating Intro: [https://www.youtube.com/watch?v=lzu\\_BTcFIC8](https://www.youtube.com/watch?v=lzu_BTcFIC8)

Gabriel and Maria Part 1: <https://youtu.be/skYYIWwXCTE>

Gabriel and Maria Part 2: <https://youtu.be/O5VV9koUHoo>

John and Sally Part 1: <https://www.youtube.com/watch?v=Sd6j4QeQRno&feature=youtu.be>

John and Sally Part 2: <https://www.youtube.com/watch?v=yAimds14XWg&feature=youtu.be>

### **Disclosing Mental Health Needs**

Disclosing Mental Health Needs Intro <https://www.youtube.com/watch?v=-T0vJx3qmg0>

Gabriel and Maria Part 1: <https://youtu.be/M0gVn2sRWV4>

Gabriel and Maria Part 2: <https://youtu.be/hzC0Whw-HRw>

John and Sally Part 1: <https://www.youtube.com/watch?v=J4gaMV0T62Y&feature=youtu.be>

John and Sally Part 2: <https://www.youtube.com/watch?v=8rSGkUEt3bA&feature=youtu.be>
